# Supplementary material
Source: PubMed Central journal article supplement (PMC9351472)
Supplement: awab378_supplementary_data.pdf [file awab378_supplementary_data.pdf]

Supplementary material

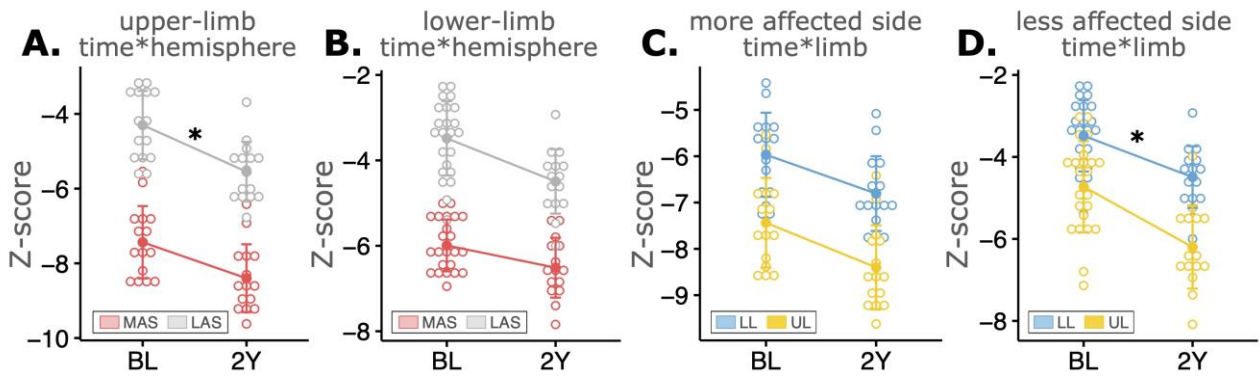

Supplementary Figure 1. Two-way interaction plots. Error-bars (average value and standard deviation) and jittered data distribution for all tested interactions. From left to the right: **A.** time by brain side in the upper-limb. **B.** time by brain side in the lower-limb. **C.** time by region of interest in the more affected side. **D.** time by region of interest in the less affected side. (\*) stands for significant interaction after two-way repeated measures ANOVA with P-value < 0.05.

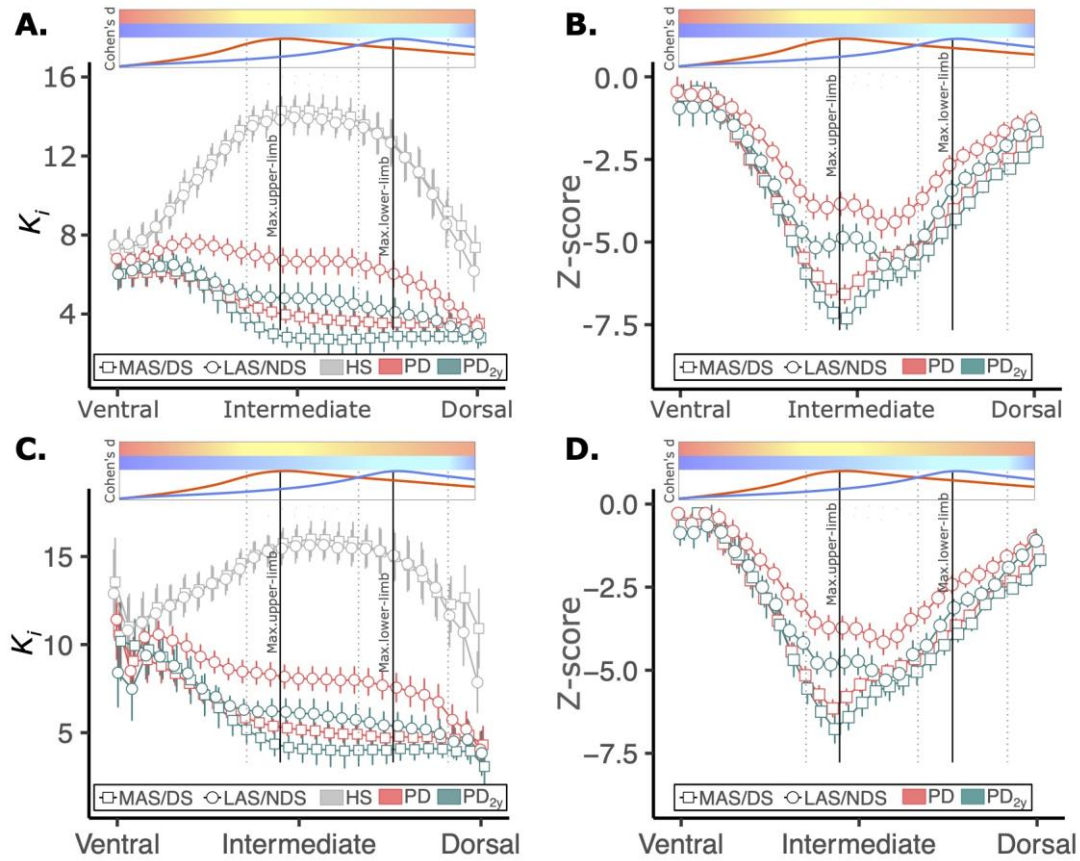

Supplementary Figure 2. Slice-wise analysis of  $^{18}\text{F}$ -DOPA images in the posterior putamen without (**A.** - **B.**) and with (**C.** - **D.**) partial volume error correction. **A.** and **C.** Error bars show  $K_i$  slice-wise averages and confidence intervals (95%) in the post-commissural putamen from the most ventral to the most dorsal extent for HS (grey), PD at baseline (red), and at 2 years follow-up (green) on both more affected and less affected sides. **B.** and **D.** Error bars show Z-scores (average and confidence interval) for  $K_i$  in PD normalized to HS, in the more affected (squares) and less affected (circles) sides. PD at baseline is represented in red and PD at 2 years follow-up in green. In all sub-figures two-color bars represent the fMRI normalized activation along the dorsoventral axis for the upper (red to yellow) and lower (dark blue to light blue) limbs. Below the colorbars two normalized curves show the strength of the group activation map along the dorsoventral axis. Maxima have been highlighted downwards with vertical lines. In dotted vertical lines the interval between the 75% of the maximum activation are also highlighted.

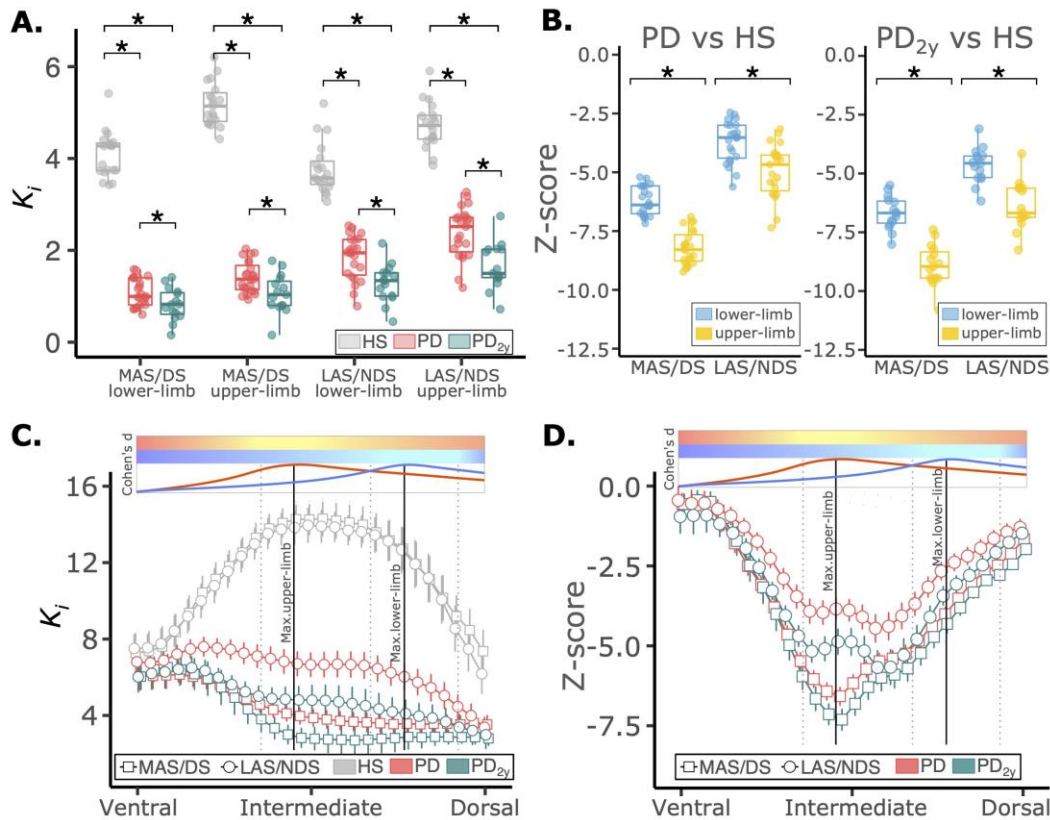

**Supplementary Figure 3. Region-based analysis of  $^{18}\text{F}$ -DOPA uptake rates in the post-commissural putamen. A.** Boxplots show weighted-average  $K_i$  values (median and  $\text{perc}_{25-75}$ ) for HS (grey) and PD at baseline (red) and at 2 year follow-up (green).  $K_i$  values in the post-commissural putamen contralateral the more affected or less affected side (MAS/LAS) were weighted by the strength (Cohen's  $d$ ) of the upper and lower limb group activation fMRI maps and averaged. \*  $P < 0.001$  with Mann Whitney U test. **B.** Boxplots show Z-scores for  $K_i$  weighted-average values (median and  $\text{perc}_{25-75}$ ) normalized to HS for upper (yellow) and lower limb (light blue). \*  $P < 0.001$  with Wilcoxon signed-rank test. **C.** Error bars show  $K_i$  slice-wise averages and confidence intervals (95%) in the post-commissural putamen from the most ventral to the most dorsal extent for HS (grey), PD at baseline (red) and at 2 year follow-up (green) on both the more affected and less affected sides. **D.** Error bars show Z-scores (average and confidence interval) for  $K_i$  in PD normalized to HS, on the more affected (squares) and less affected (circles) sides. PD at baseline is represented in red and PD at 2 year follow-up in green. In **C** and **D** two color bars represent the fMRI normalized activation along the dorsoventral axis for the upper (red to yellow) and lower (dark blue to light blue) limbs. Below the colorbars two normalized curves show the strength of the group activation map along the dorsoventral axis. Maxima have been highlighted downwards with vertical lines. In dotted vertical lines the interval between the 75% of the maximum activation are also highlighted.

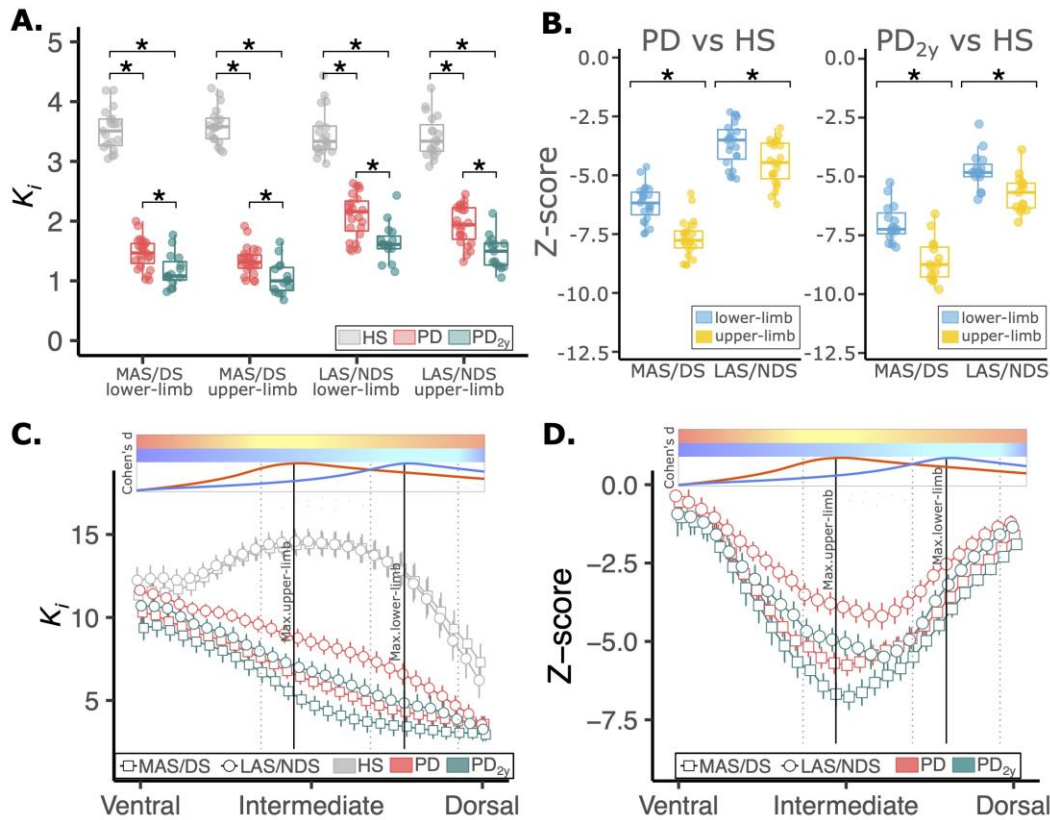

**Supplementary Figure 4. Region-based analysis of  $^{18}\text{F}$ -DOPA uptake rates in the whole putamen.** **A.** Boxplots show weighted-average  $K_i$  values (median and perc<sub>25-75</sub>) for HS (grey) and PD at baseline (red) and at 2 year follow-up (green).  $K_i$  values in the whole putamen contralateral the more affected or less affected side (MAS/LAS) were weighted by the strength (Cohen's  $d$ ) of the upper and lower limb group activation fMRI maps and averaged. \*  $P < 0.001$  with Mann Whitney U test. **B.** Boxplots show Z-scores for  $K_i$  weighted-average values (median and perc<sub>25-75</sub>) normalized to HS for upper (yellow) and lower limb (light blue). \*  $P < 0.001$  with Wilcoxon signed-rank test. **C.** Error bars show  $K_i$  slice-wise averages and confidence intervals (95%) in the whole putamen from the most ventral to the most dorsal extent for HS (grey), PD at baseline (red) and at 2 year follow-up (green) on both the more affected and less affected sides. **D.** Error bars show Z-scores (average and confidence interval) for  $K_i$  in PD normalized to HS, on the more affected (squares) and less affected (circles) sides. PD at baseline is represented in red and PD at 2 year follow-up in green. In **C** and **D** two color bars represent the fMRI normalized activation along the dorsoventral axis for the upper (red to yellow) and lower (dark blue to light blue) limbs. Below the colorbars two normalized curves show the strength of the group activation map along the dorsoventral axis. Maxima have been highlighted downwards with vertical lines. In dotted vertical lines the interval between the 75% of the maximum activation are also highlighted.

**Supplementary Table 1.  $^{18}\text{F}$ -DOPA uptake rates corresponding to putaminal hand and foot fMRI group activations.** *P*-values after non-parametric with Wilcoxon signed-rank test evaluating pair-wise differences for  $^{18}\text{F}$ -DOPA  $K_i$  weighted-average values between hand and foot functional divisions. Weighted averages are shown for the whole putamen (3<sup>rd</sup> column) and for the post-commissural putamen (5<sup>th</sup> column). Reported values are represented as median and interquartile ranges.

| Group            | ROI      | $K_i$ weighted average (putamen) | <i>P</i> -value (Foot vs Hand) | $K_i$ weighted average (posterior putamen) | <i>P</i> -value (Foot vs Hand) |
|------------------|----------|----------------------------------|--------------------------------|--------------------------------------------|--------------------------------|
| HS               | DS-Foot  | 3.51 [3.27-3.71]                 | <i>P</i> = 0.0663              | 4.27 [3.74-4.34]                           | <i>P</i> < 0.001               |
|                  | DS-Hand  | 3.58 [3.38-3.72]                 |                                | 5.14 [4.81-5.43]                           |                                |
|                  | NDS-Foot | 3.33 [3.20-3.59]                 | <i>P</i> > 0.05                | 3.58 [3.44-3.94]                           | <i>P</i> < 0.001               |
|                  | NDS-Hand | 3.34 [3.17-3.61]                 |                                | 4.72 [4.42-4.94]                           |                                |
| PD <sub>BL</sub> | MAS-Foot | 1.47 [1.29-1.63]                 | <i>P</i> < 0.001               | 1.00 [0.81-1.40]                           | <i>P</i> < 0.001               |
|                  | MAS-Hand | 1.31 [1.21-1.43]                 |                                | 1.37 [1.15-1.67]                           |                                |
|                  | LAS-Foot | 2.16 [1.84-2.34]                 | <i>P</i> < 0.001               | 1.95 [1.46-2.24]                           | <i>P</i> < 0.001               |
|                  | LAS-Hand | 1.94 [1.70-2.22]                 |                                | 2.52 [1.97-2.72]                           |                                |
| PD <sub>2y</sub> | MAS-Foot | 1.08 [1.02-1.32]                 | <i>P</i> < 0.001               | 0.82 [0.61-1.08]                           | <i>P</i> < 0.001               |
|                  | MAS-Hand | 1.00 [0.84-1.22]                 |                                | 1.04 [0.80-1.33]                           |                                |
|                  | LAS-Foot | 1.61 [1.54-1.75]                 | <i>P</i> < 0.001               | 1.34 [1.00-1.51]                           | <i>P</i> < 0.001               |
|                  | LAS-Hand | 1.50 [1.27-1.63]                 |                                | 1.50 [1.41-2.02]                           |                                |
